# Supplementary material for: Enhanced Efficiency in Dye-Sensitized Solar Cells by Electron Transport and Light Scattering on Freestanding TiO2 Nanotube Arrays
Source: MDPI journal article supplement (doi:10.3390/nano7100345), 2017-10-24
Supplement: s1 [file s1]

# Supplementary Information

## Enhanced Efficiency in Dye-Sensitized Solar Cells by Electron Transport and Light Scattering on Freestanding TiO<sub>2</sub> Nanotube Arrays

Won-Yeop Rho <sup>1</sup>, Da Hyun Song <sup>2</sup>, Sang Hun Lee <sup>1</sup> and Bong-Hyun Jun <sup>1,\*</sup>

<sup>1</sup> Department of Bioscience and Biotechnology, Konkuk University, Seoul 143-701, Korea; rho7272@gmail.com (W.-Y.R.); shlee.ucb@gmail.com (S.H.L.)

<sup>2</sup> Department of Chemistry, Seoul National University, Seoul 151-747, Korea; songssi87@snu.ac.kr

\* Correspondence: bjun@konkuk.ac.kr; Tel.: +82-2-450-0521

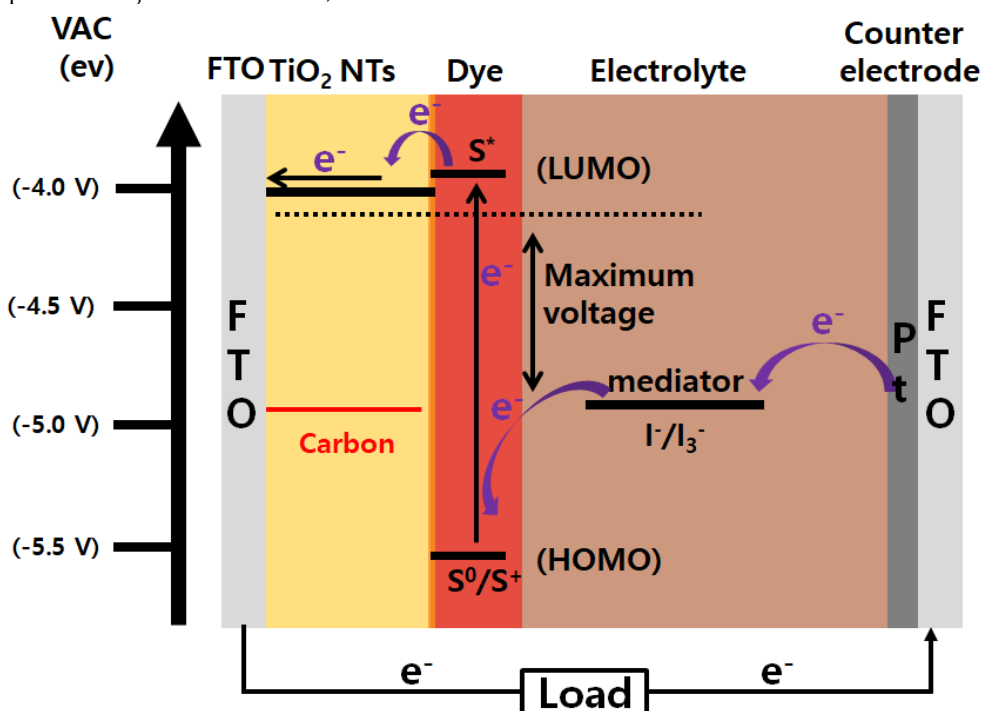

Figure S1. Energy band diagram of DSSCs based on closed- or open-ended TiO<sub>2</sub> nanotube arrays with carbon materials.

When carbon materials were introduced on the closed- or open-ended TiO<sub>2</sub> nanotube arrays, the energy level of the conduction band of the closed- or open-ended TiO<sub>2</sub> nanotube arrays decreased, since work functions of the carbon materials were low (-4.9 eV) as shown in Figure S1. Compared to the DSSCs based on closed-ended TiO<sub>2</sub> nanotube arrays, the  $V_{oc}$  value of the DSSCs based on open-ended TiO<sub>2</sub> nanotube arrays showed a small increment (0.80 V to 0.81 V) due to an increase in electron density of the TiO<sub>2</sub> nanotube arrays from higher electron density. However, when carbon materials were introduced on the closed- or open-ended TiO<sub>2</sub> nanotube arrays, the  $V_{oc}$  value of the DSSCs showed a slight decrement (0.81 V to 0.79 V) because of the reduced work function of carbon materials. Enhancing electron transport by carbon materials would be helpful to improve the  $J_{sc}$  value which is positive to energy conversion efficiency.

## Reference

1. Rho, C.; Min, J.-H.; Suh, J.S. Barrier layer effect on the electron transport of the dye-sensitized solar cells based on TiO<sub>2</sub> nanotube arrays. *J. Phys. Chem. C* **2012**, *116*, 7213–7218.
2. Rho, W.-Y.; Chun, M.-H.; Kim, H.-S.; Kim, H.-M.; Suh, J.S.; Jun, B.-H. Ag Nanoparticle—Functionalized Open-Ended Freestanding TiO<sub>2</sub> Nanotube Arrays with a Scattering Layer for Improved Energy Conversion Efficiency in Dye-Sensitized Solar Cells. *Nanomaterials* **2016**, *6*, 117.
3. Rho, W.-Y.; Kim, H.-S.; Kim, H.-M.; Suh, J.S.; Jun, B.-H. Carbon-doped freestanding TiO<sub>2</sub> nanotube arrays in dye-sensitized solar cells. *New J. Chem.* **2017**, *41*, 285–289.
4. Kim, H.-S.; Chun, M.-H.; Suh, J.S.; Jun, B.-H.; Rho, W.-Y. Dual Functionalized Freestanding TiO<sub>2</sub> Nanotube Arrays Coated with Ag Nanoparticles and Carbon Materials for Dye-Sensitized Solar Cells. *Appl. Sci.* **2017**, *7*, 576.
